# Supplementary material for: Arbuscular Mycorrhizal Fungi Induce Changes of Photosynthesis-Related Parameters in Virus Infected Grapevine
Source: MDPI journal article supplement (doi:10.3390/plants12091783), 2023-04-26
Supplement: s1 [file s1]

**Supplementary Table S1.** Growth parameters and dry content of grapevine interacting with AMF and viruses. The data is presented as mean  $\pm$  SD.

| Treatment             | Viral status              | Shoot Length (cm) | Internode Length (cm) | DW/FW                           |
|-----------------------|---------------------------|-------------------|-----------------------|---------------------------------|
| T1                    | NO VIRUS                  | 33.3 $\pm$ 5.30   | 1.6 $\pm$ 0.58        | 0.37 $\pm$ 0.01 <sup>abcd</sup> |
| T2                    |                           | 77.5 $\pm$ 12.02  | 2.5 $\pm$ 0.28        | 0.4 $\pm$ 0.02 <sup>abcd</sup>  |
| T3                    |                           | 101.5 $\pm$ 19.09 | 2.9 $\pm$ 0.04        | 0.39 $\pm$ 0.01 <sup>abcd</sup> |
| T4                    | GRSPaV                    | 51.0 $\pm$ 4.18   | 2.0 $\pm$ 0.22        | 0.36 $\pm$ 0.01 <sup>abc</sup>  |
| T5                    |                           | 62.6 $\pm$ 3.07   | 2.5 $\pm$ 0.23        | 0.43 $\pm$ 0.01 <sup>d</sup>    |
| T6                    |                           | 83.4 $\pm$ 16.74  | 2.5 $\pm$ 0.37        | 0.37 $\pm$ 0.02 <sup>ab</sup>   |
| T7                    | GRSPaV +<br>GLRaV-3       | 46.8 $\pm$ 6.72   | 2.0 $\pm$ 0.04        | 0.35 $\pm$ 0.01 <sup>ab</sup>   |
| T8                    |                           | 62.3 $\pm$ 11.68  | 2.6 $\pm$ 0.43        | 0.41 $\pm$ 0.02 <sup>bcd</sup>  |
| T9                    |                           | 71.3 $\pm$ 10.02  | 2.3 $\pm$ 0.06        | 0.39 $\pm$ 0.01 <sup>abcd</sup> |
| T10                   | GRSPaV +<br>GPGV          | 48.7 $\pm$ 11.50  | 1.9 $\pm$ 0.35        | 0.4 $\pm$ 0.01 <sup>abcd</sup>  |
| T11                   |                           | 64.8 $\pm$ 18.87  | 2.4 $\pm$ 0.28        | 0.4 $\pm$ 0.01 <sup>abcd</sup>  |
| T12                   |                           | 78.0 $\pm$ 18.75  | 2.5 $\pm$ 0.38        | 0.4 $\pm$ 0.02 <sup>abcd</sup>  |
| T13                   | GRSPaV +                  | 36.0 $\pm$ 2.83   | 1.7 $\pm$ 0.13        | 0.34 $\pm$ 0.01 <sup>a</sup>    |
| T14                   | GLRaV-3 +                 | 64.6 $\pm$ 13.91  | 2.5 $\pm$ 0.41        | 0.41 $\pm$ 0.02 <sup>cd</sup>   |
| T15                   | GPGV                      | 59.0 $\pm$ 16.90  | 2.3 $\pm$ 0.66        | 0.38 $\pm$ 0.03 <sup>abc</sup>  |
| Virus                 | No                        | 70.8 $\pm$ 32.7   | 2.3 $\pm$ 0.6         | 0.38 $\pm$ 0.02                 |
|                       | GRSPaV                    | 69.4 $\pm$ 18.3   | 2.4 $\pm$ 0.4         | 0.39 $\pm$ 0.03                 |
|                       | GRSPaV +<br>GLRaV3        | 61.8 $\pm$ 13.3   | 2.3 $\pm$ 0.4         | 0.39 $\pm$ 0.03                 |
|                       | GRSPaV + GPGV             | 66.0 $\pm$ 13.8   | 2.3 $\pm$ 0.4         | 0.40 $\pm$ 0.02                 |
|                       | GRSPaV +<br>GLRaV3 + GPGV | 58.9 $\pm$ 19.4   | 2.3 $\pm$ 0.5         | 0.39 $\pm$ 0.04                 |
|                       | <i>p</i>                  | ns                | ns                    | ns                              |
| AMF                   | No AMF                    | 45.2 $\pm$ 9.1    | 1.9 $\pm$ 0.3         | 0.36 $\pm$ 0.02 <sup>a</sup>    |
|                       | <i>R. irregularis</i>     | 65.0 $\pm$ 13.1   | 2.3 $\pm$ 0.3         | 0.41 $\pm$ 0.02 <sup>c</sup>    |
|                       | Mix AMF                   | 77.2 $\pm$ 21.3   | 2.5 $\pm$ 0.4         | 0.38 $\pm$ 0.02 <sup>b</sup>    |
|                       | <i>p</i>                  | ns                | ns                    | < 0.001                         |
| Virus $\times$<br>AMF | F                         | 0.937             | 0.517                 | 2.73                            |
|                       | <i>p</i>                  | ns                | ns                    | 0.016                           |

The lowercase letters represent statistically significant difference in growth parameter revealed by two-way ANOVA.
